# Supplementary material for: mTOR inhibition enhances the antitumor efficacy of RAF dimer-MEK blockade by inhibiting the ATF4-MTHFD2 pathway
Source: Research Square preprint supplement (doi:10.21203/rs.3.rs-6857127/v1), 2025-07-18
Supplement: Supplementary file 1 [file 145ec98bcdf5ef3ba5914de0.docx]

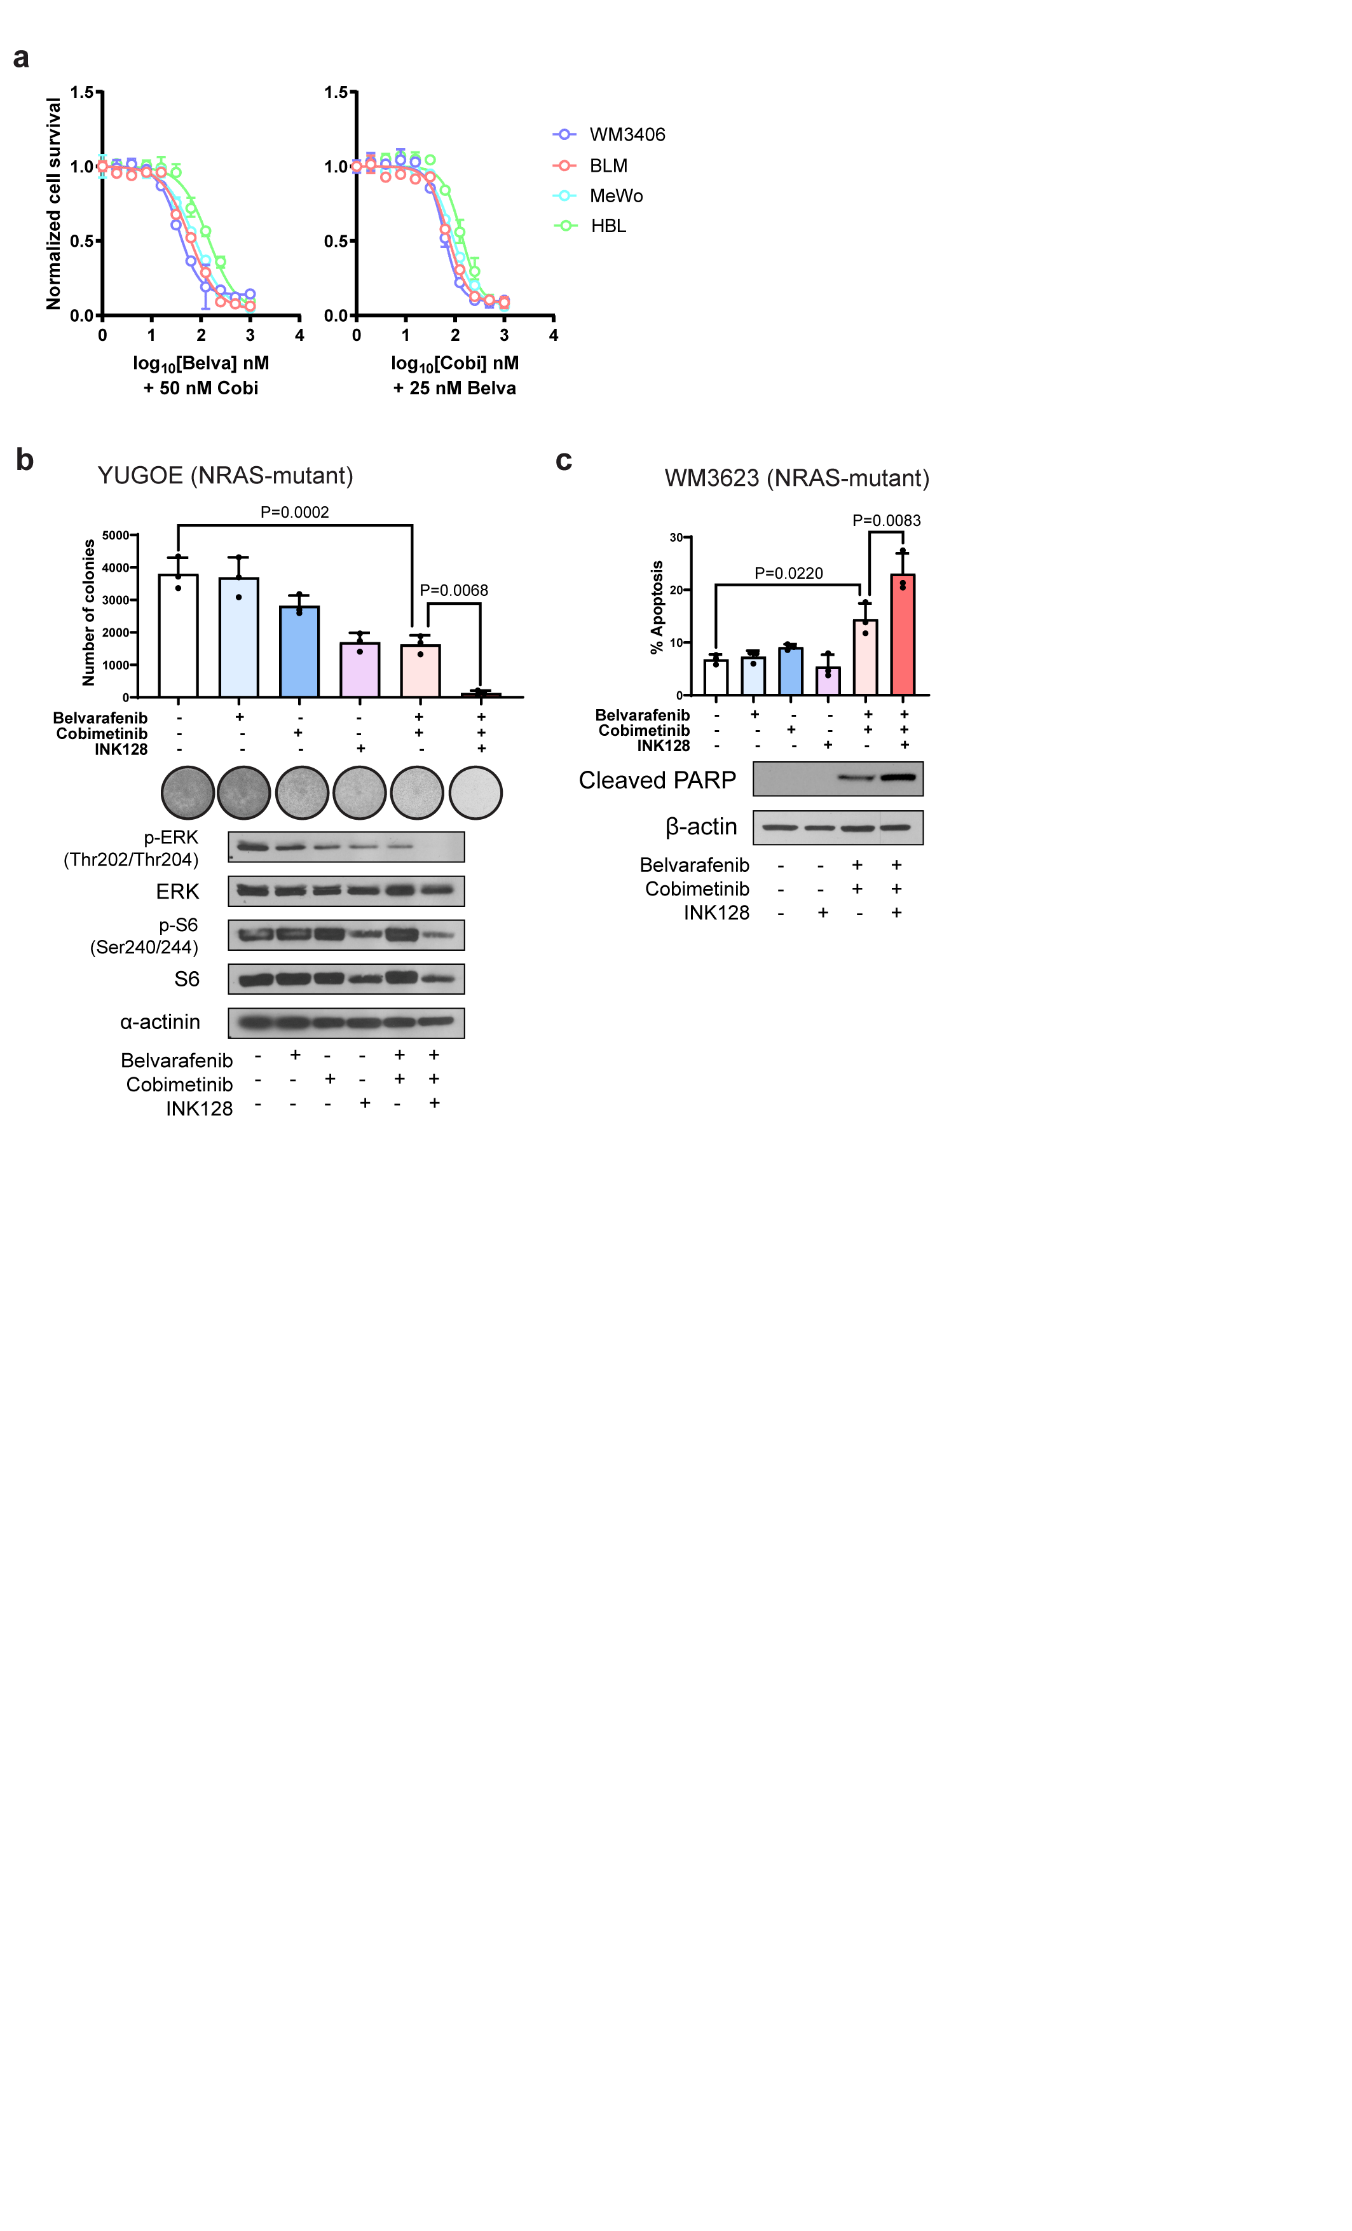


**Supplementary Fig. 1 Blocking the mTOR pathway with INK128 augments therapeutic responses to belvarafenib plus cobimetinib therapy in melanoma cells.**

**a**, Left: IC50 curve for belvarafenib inhibition of WM3406 cell (IC50 = 35.68 nM), BLM cell (IC50 = 59.30 nM), MeWo cell (IC50 = 73.83 nM) and HBL cell (IC50 = 142.4 nM) with the treatment of 50 nM of cobimetinib (n=4). Right: IC50 curve for cobi inhibition of WM3406 cell (IC50 = 60.19 nM), BLM cell (IC50 = 71.13 nM), MeWo cell (IC50 = 88.81 nM) and HBL cell (IC50 = 137.0 nM) with the treatment of 25 nM of belva (n=4). **b**, Colony number of YUGOE cells following belvarafenib (25 nM), cobimetinib (50 nM) and INK128 (25 nM) treatment (top) and western blot analysis to confirm the on-target effect of indicated drugs (bottom) (n=3). One-way ANOVA. **c**,Percent apoptosis measured as the sum of PI+/Annexin V+ and PI-/Annexin V+ populations (top) and western blot analysis to confirm the induction of apoptosis (cleaved PARP (cl-PARP)) in WM3623 cells (bottom) (n=3). One-way ANOVA. Data are presented as mean ± SD. Number of biological replicates is indicated in each graph.


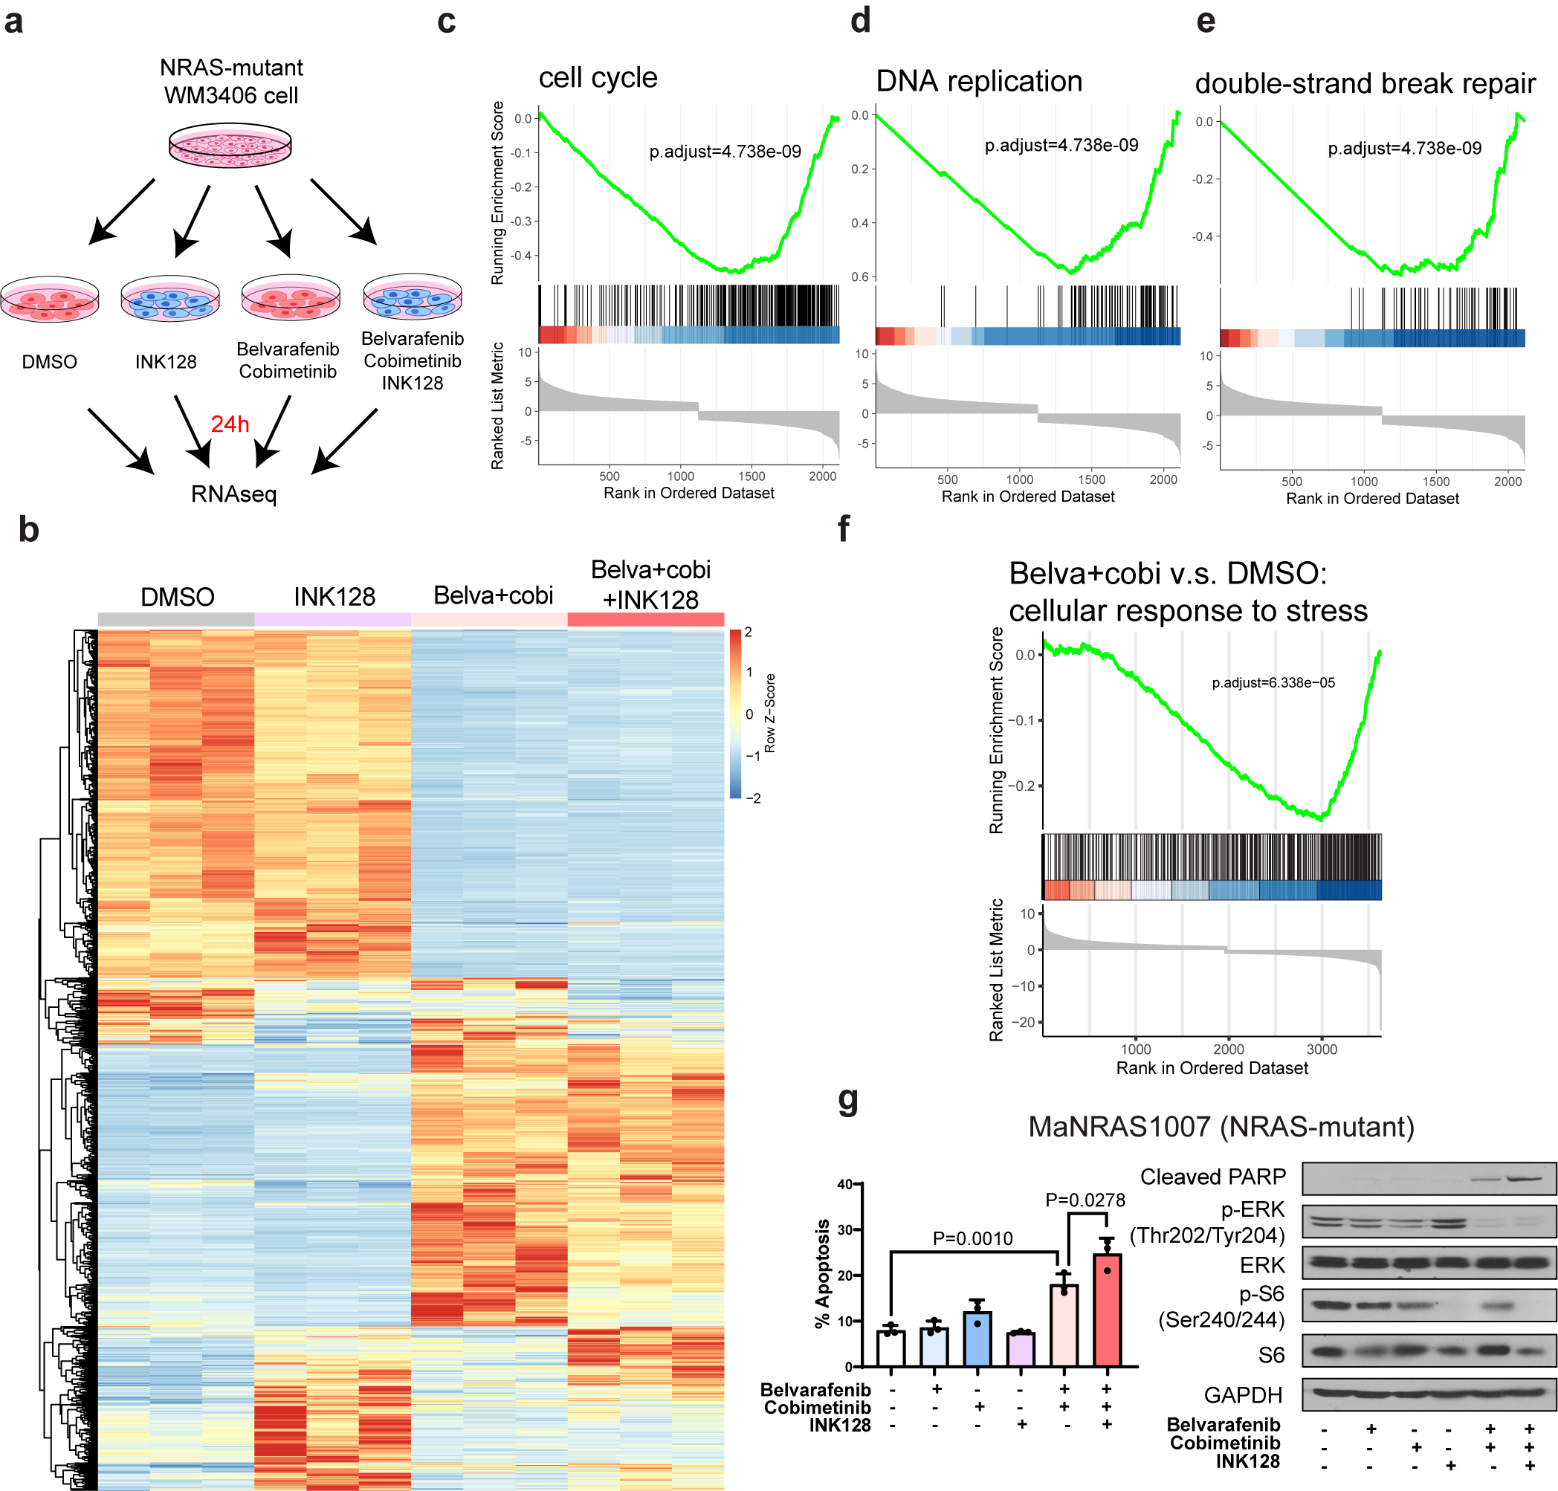


**Supplementary Fig. 2 RNA sequencing data and pathway analysis from WM3406-treated cells.**

**a**, Schematic of the treatment on NRAS-mutant WM3406 melanoma cell line for RNA sequencing. **b**, Heatmap showing genes that were altered in drug treated cells relative to DMSO treated cells. GSEA for DEGs of triple therapy treated cells in **c** cell cycle, **d** DNA replication and **e** double-strand break repair. **f**, GSEA for DEGs of belvarafenib plus cobimetinib treated cells in cellular response to stress. **g**, Apoptosis (left graph) and western blot analysis (shown right) done in MaNRAS1007 cells with indicated treatment (n=3). Data are presented as mean ± SD.


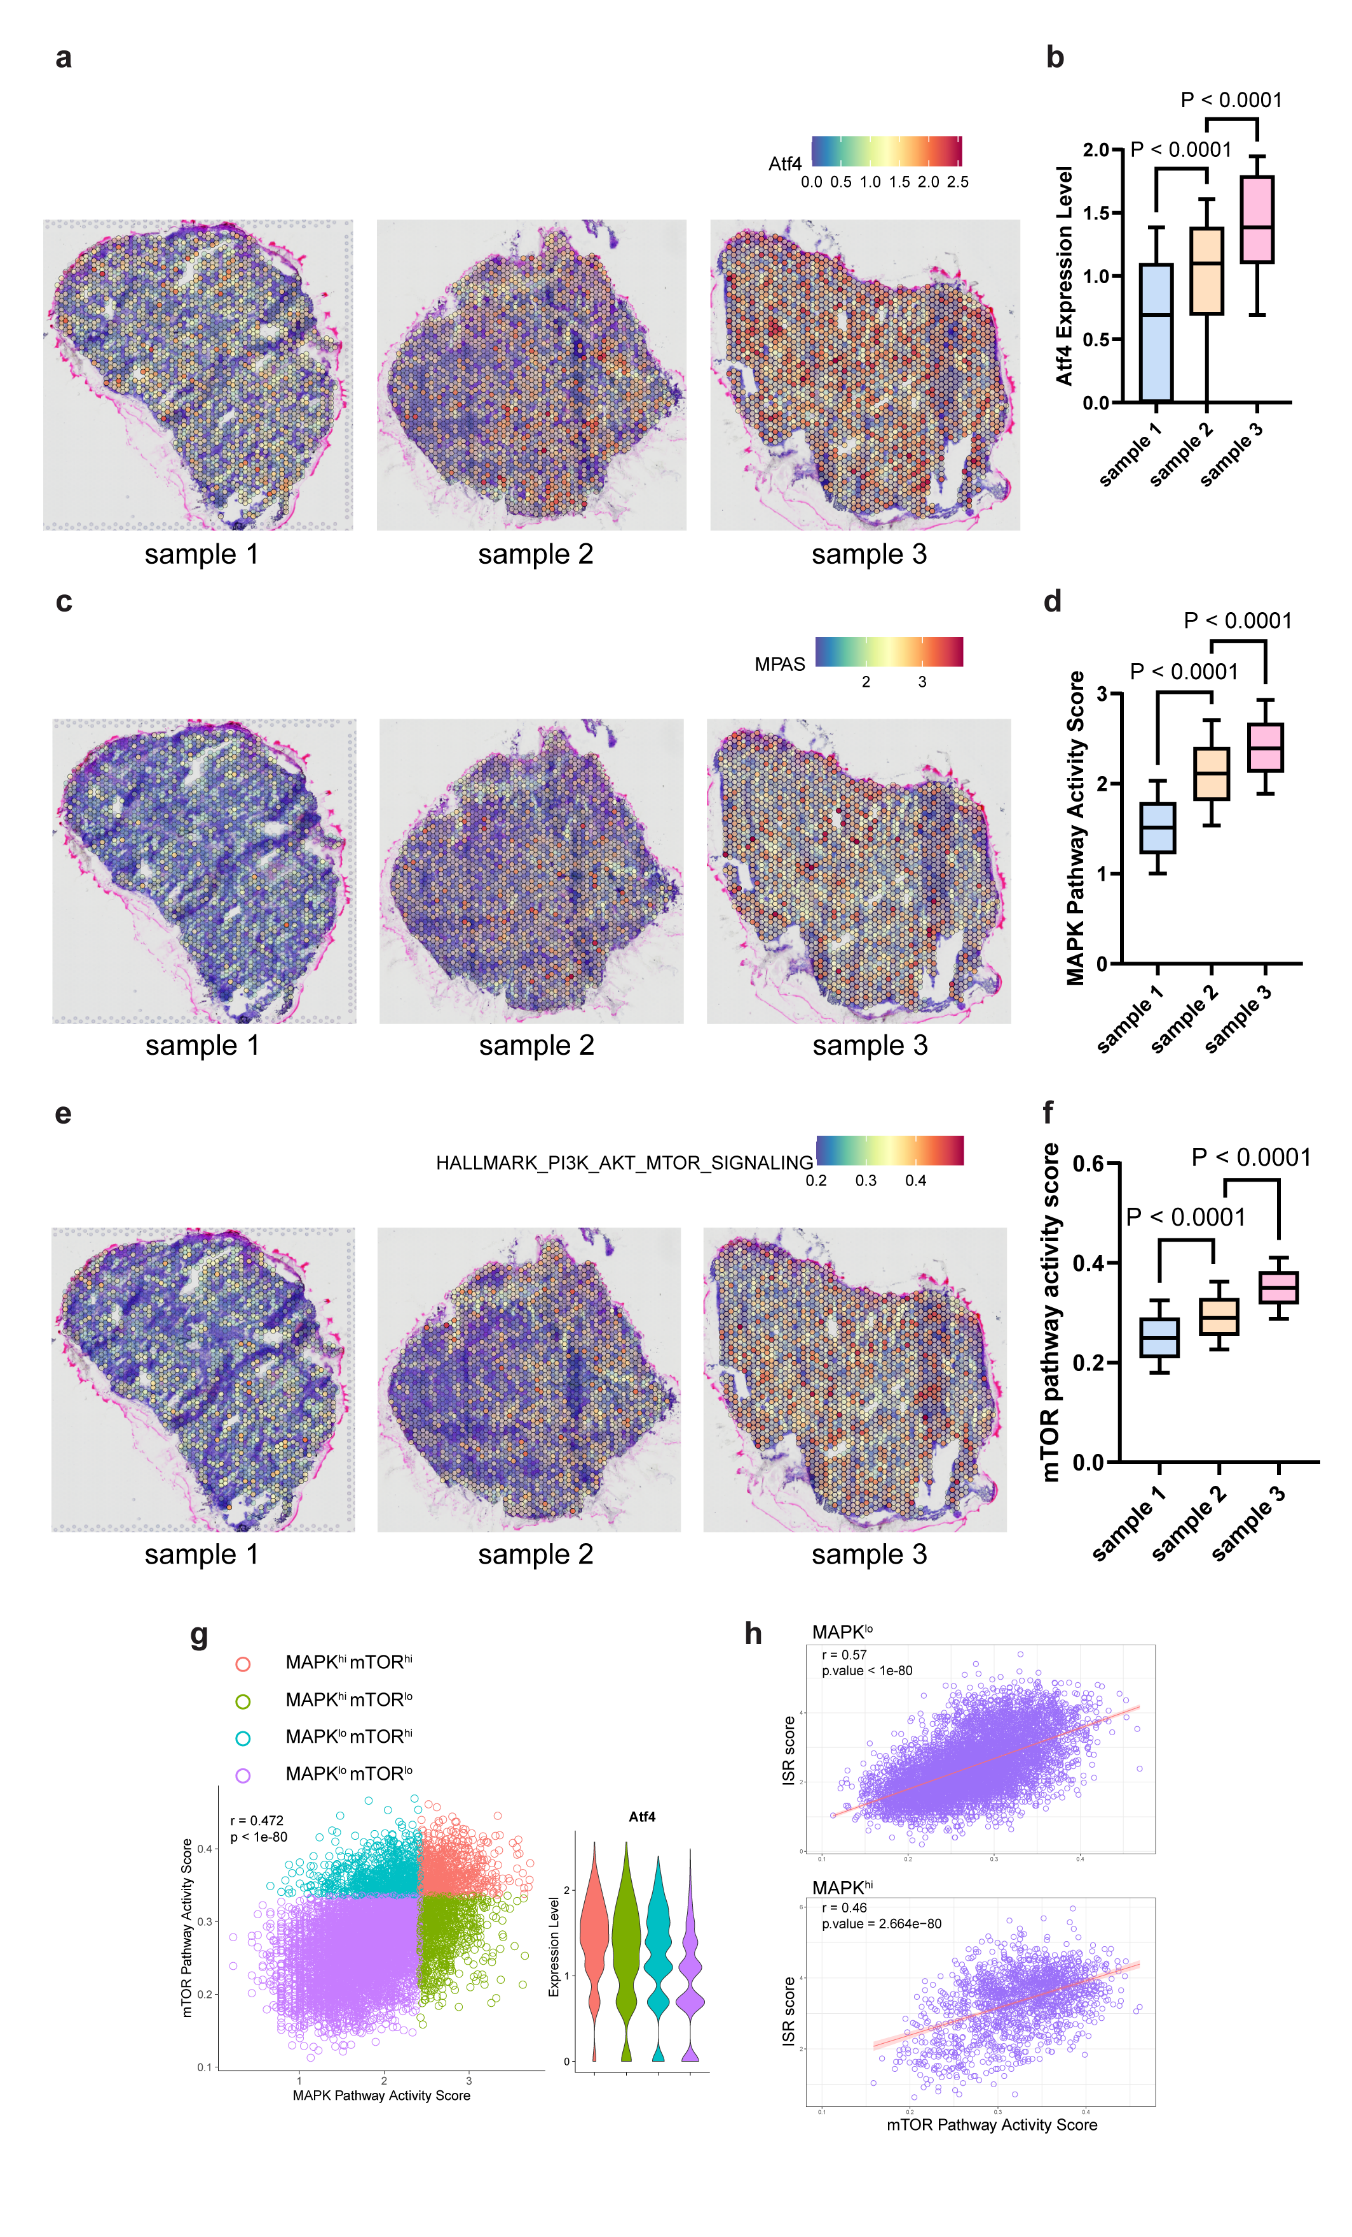


**Supplementary Fig. 3 Spatially mapping ATF4 expression, MAPK and mTOR pathway activity in *NRAS*-mutant melanoma.**

Spatially resolved quantification of **a** *Atf4* expression, **c** MPAS score and **e** mTOR pathway activity score by label transfer of scRNA-seq data onto Visium spots (sample 1,2,3). **b**, **d** and **f** are quantification of **a**, **c** and **e**, respectively. Boxes extend from the 25th to 75th percentile. The middle line represents the median. Whiskers represent 10th to 90th percentile. One-way ANOVA. **g**, (Left) The scatter plot showing the correlation between the MPAS and mTOR pathway activity score. The 20th percentile cutoff line set to distinguish cells with different MAPK and mTOR activity. Pearson correlation. (right) The violin plot showing the expression of *Atf4* in cell populations with distinct MAPK and mTOR pathway activity. **h**, The scatter plot showing the correlation between the mTOR pathway activity score and ISR score in MAPKhi (top) and MAPKlo (bottom) cell population. Pearson correlation.


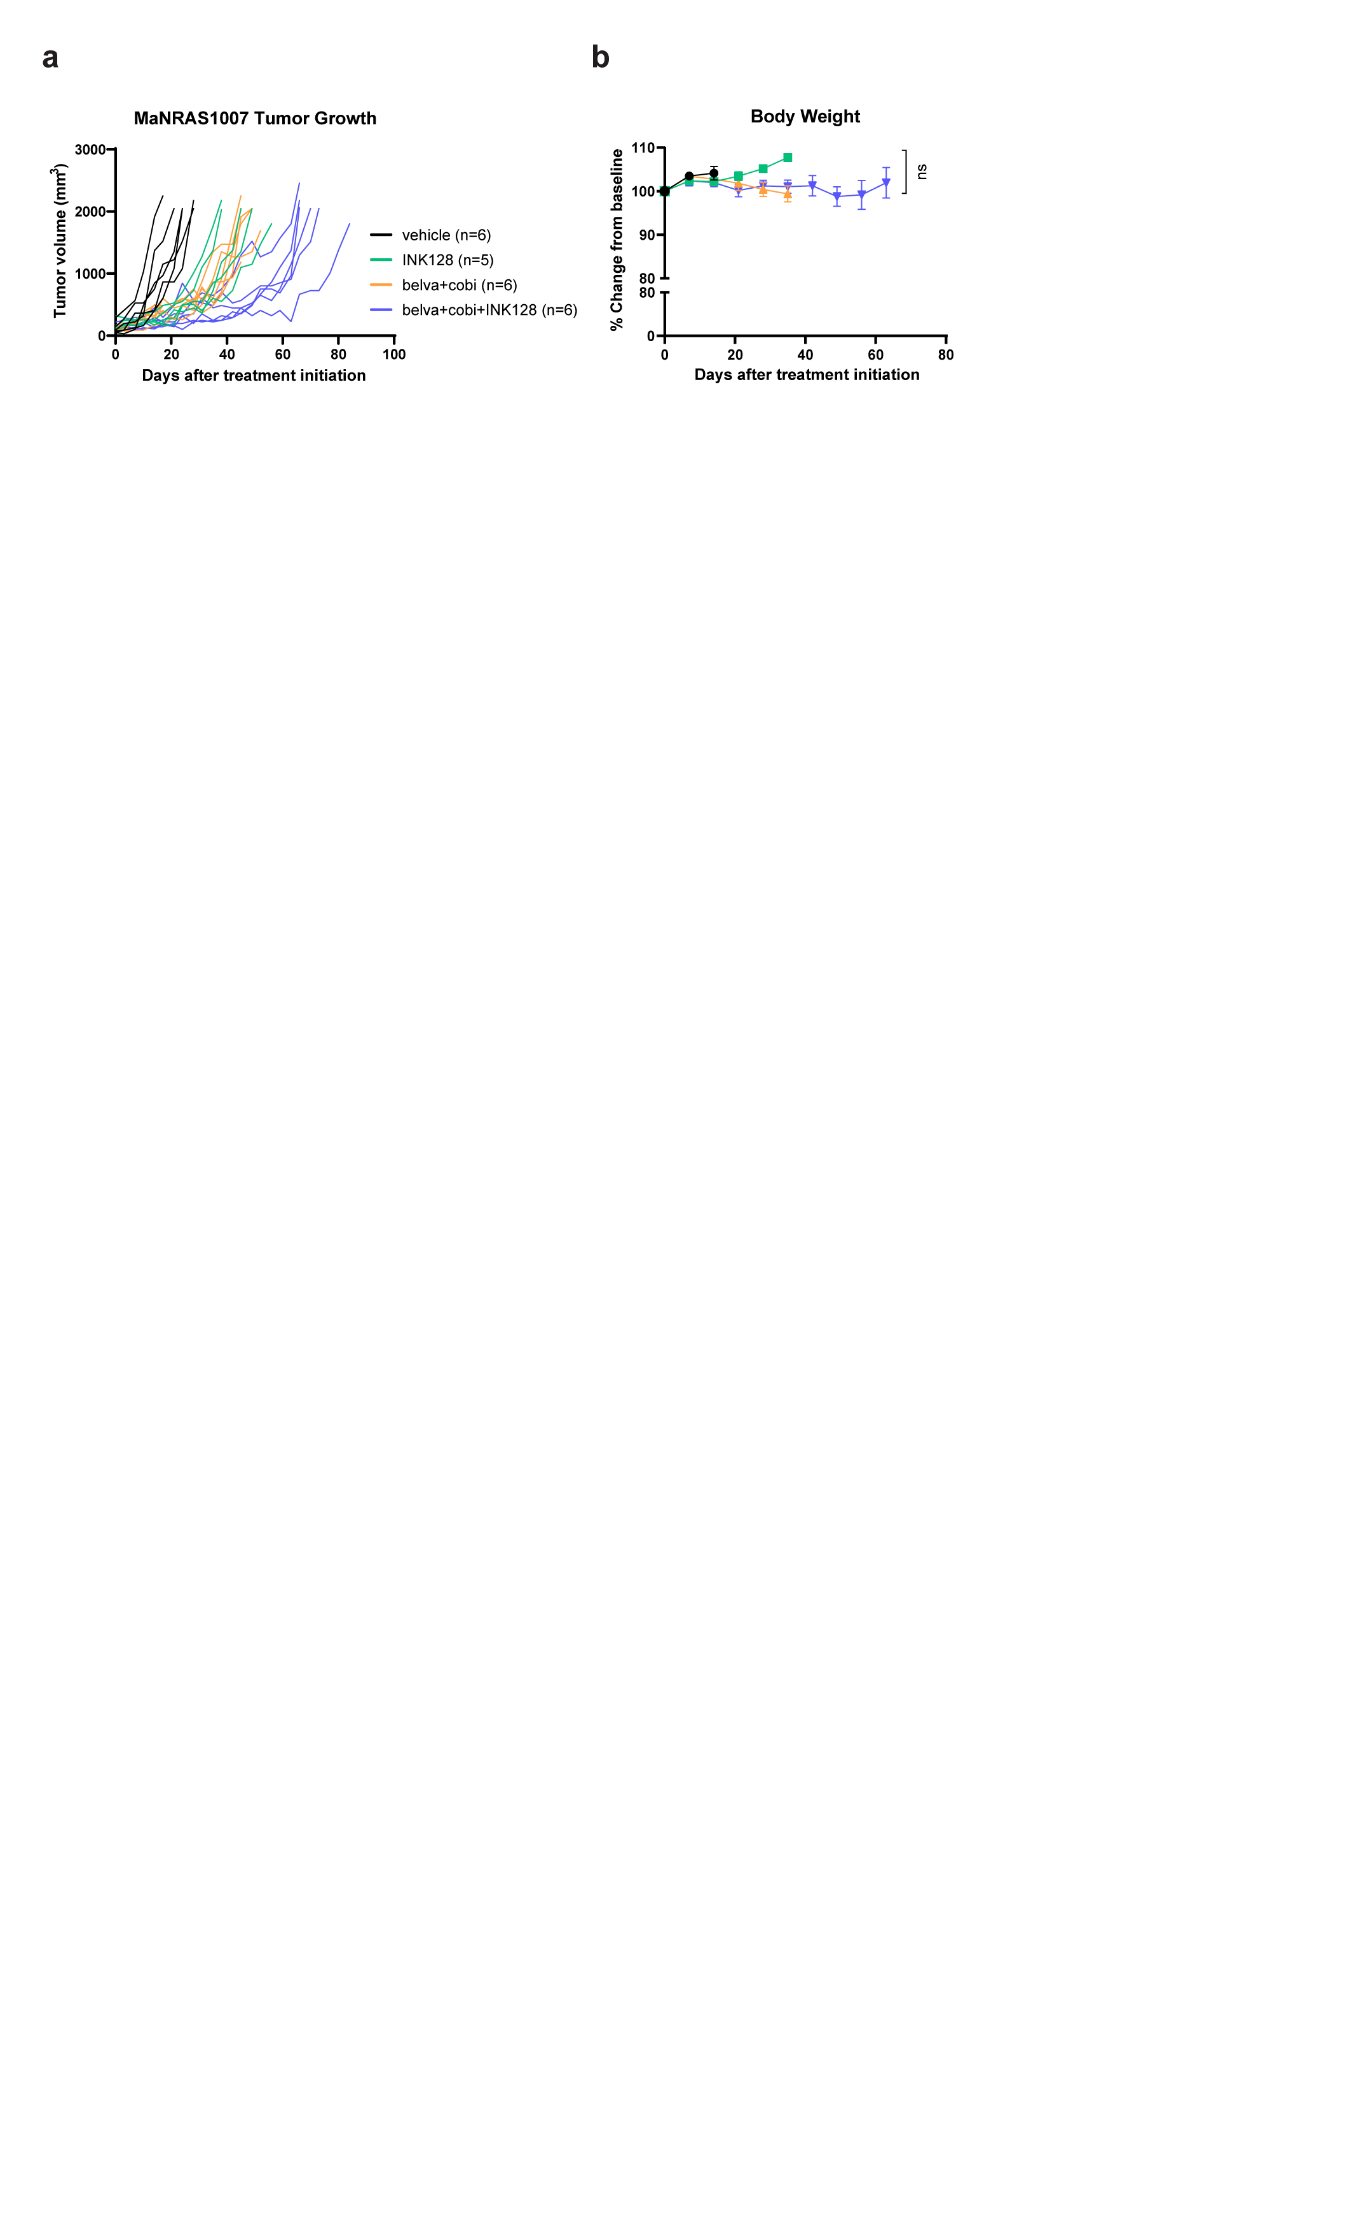


**Supplementary Fig. 4 The triple therapy demonstrates anti-tumoral activity in MaNRAS1007 melanoma models.**

**a**. Individual growth of MaNRAS1007-derived melanomas and **b**. Relative weight change (% initial body weight prior to treatment) in mice receiving indicated treatments, related to Fig. 5b.

**Supplementary Table 1.** Detailed information of the differential expression of ATF4 target genes in triple therapy treated WM3406 cells relative to DMSO treated cells, related to Fig. 3a.

|  | **log2FoldChange** | **padj** |
| --- | --- | --- |
| *PTGS2* | -2.97221 | 1.12E-28 |
| *PSAT1* | -2.31722 | 5.07E-14 |
| *FGF19* | -1.56699 | 0.679829 |
| *MTHFD2* | -1.31614 | 4.73E-09 |
| *GPT2* | -1.13739 | 2.16E-10 |
| *GDF15* | -1.13406 | 0.000619 |
| *IARS* | -1.05885 | 8.87E-19 |
| *VARS* | -0.9462 | 7.95E-15 |
| *YARS* | -0.87706 | 1.50E-18 |
| *HSPA5* | -0.79365 | 4.59E-13 |
| *LARS* | -0.71443 | 1.34E-09 |
| *NARS* | -0.6965 | 4.42E-13 |
| *EIF2S2* | -0.64437 | 2.28E-10 |
| *SLC7A11* | -0.57595 | 0.15451 |
| *VEGFA* | -0.57257 | 0.092853 |
| *WARS* | -0.48911 | 6.35E-06 |
| *TRIB3* | -0.45597 | 0.163654 |
| *MKNK2* | -0.37519 | 0.100939 |
| *GARS* | -0.35951 | 0.025014 |
| *ASNS* | -0.35587 | 0.294096 |
| *ATG7* | -0.33503 | 0.028952 |
| *CHAC1* | -0.22413 | 0.740315 |
| *AARS* | -0.18934 | 0.239977 |
| *CEBPB* | -0.13112 | 0.71613 |
| *ALDH18A1* | -0.07349 | 0.748133 |
| *SARS* | 0.116661 | 0.498907 |
| *EPRS* | 0.338899 | 0.012657 |
| *HERPUD1* | 0.504504 | 0.001681 |
| *MAP1LC3B* | 0.529188 | 3.87E-10 |
| *DDIT3* | 0.617199 | 0.055697 |
| *VLDLR* | 0.727958 | 0.137348 |
| *KDM7A* | 1.027052 | 0.000397 |
| *SQSTM1* | 1.077674 | 3.15E-20 |
| *DDIT4* | 1.260573 | 5.56E-06 |
| *PPP1R15A* | 1.361313 | 6.86E-45 |
| *JDP2* | 1.831611 | 4.69E-11 |
| *ATF3* | 3.17252 | 1.55E-30 |

**Supplementary Table 2.** Detailed information of human cell lines, source, culture conditions, treatment, and experimental timeline.

| Cell line & source | Cultured in | Treatment | Timeline |
| --- | --- | --- | --- |
| BLM  Gifted by Dr. Ian R Watson (MUHC Research Institute) | DMEM | Belva (25 nM)  Cobi (50 nM)  INK128 (25 nM) | Apoptosis assay: 48h  Western blot (WB) for p-ERK: 2h  WB for p-S6: 2h  WB for cleaved PARP: 48h  WB for ATF4: 24h  WB for p-eIF2α: 24h  WB for MTHFD2: 48h  WB for γH2AX: 48h  qPCR for MTHFD2: 24h |
| WM3406  Gifted by Dr. April Rose (Lady Davis Institute) | RPMI  1x GlutaMax |
| MeWo  Gifted by Dr. Ian R Watson (MUHC Research Institute) | DMEM |
| HBL  Gifted by Dr. Ghanem Ghanem (Institut Jules Bordet) | Ham’s F10 |
| YUGOE  Gifted by Dr. April Rose (Lady Davis Institute) | DMEM/F12 |
| WM3623  Gifted by Dr. April Rose (Lady Davis Institute) | RPMI  1x GlutaMax |
| MaNRAS1007  Gifted by Dr. Lionel Larue (INSERM)  (First described in PMID: 31251472) | Ham’s F12 | Belva (25 nM)  Cobi (10 nM)  INK128 (25 nM) | Apoptosis assay: 24h  WB for p-ERK: 24h  WB for p-S6: 24h  WB for cleaved PARP: 24h  WB for ATF4: 24h |

* All cells were cultured in the indicated medium supplemented with 10% FBS and 1x Pen/Strep.

**Supplementary Table 3.** Detailed information of the primary antibodies used for western blotting and immunohistochemistry staining.

| **Target** | **Antibody full name** | **Source & Catalog #** | **Experiment** |
| --- | --- | --- | --- |
| p-ERK | Phospho-p44/42 MAPK (Erk1/2) (Thr202/Tyr204) (D13.14.4E) XP® Rabbit mAb | Cell Signaling Technology #4370 | WB, IHC |
| ERK2 | ERK 2 Antibody (C-14) | Santa Cruz, sc-154 | WB |
| p-S6 | Phospho-S6 Ribosomal Protein (Ser240/244) (D68F8) XP® Rabbit mAb | Cell Signaling Technology #5364 | WB, IHC |
| S6 | S6 Ribosomal Protein (54D2) Mouse mAb | Cell Signaling Technology #2317 | WB |
| cl-PARP | Cleaved PARP (Asp214) (D64E10) XP® Rabbit mAb | Cell Signaling Technology #5625 | WB |
| cl-PARP | Cleaved PARP (Asp214) Antibody | Cell Signaling Technology #9544 | WB |
| ATF4 | ATF-4 (D4B8) Rabbit mAb | Cell Signaling Technology #11815 | WB, IHC |
| ATF4 | Anti-ATF-4 antibody | Abcam ab216839 | WB, IHC |
| p-eIF2α | Phospho-eIF2α (Ser51) (D9G8) XP® Rabbit mAb | Cell Signaling Technology #3398 | WB |
| eIF2α | eIF2α (L57A5) Mouse mAb | Cell Signaling Technology #2103 | WB |
| MTHFD1 | MTHFD1 Polyclonal antibody | Proteintech 10794-1-AP | WB |
| MTHFD2 | MTHFD2 Polyclonal antibody | Proteintech 12270-1-AP | WB, IHC |
| γH2AX | Phospho-Histone H2A.X (Ser139) Antibody | Cell Signaling Technology #2577 | WB |
| α-Actinin | Anti-α-actinin Antibody (H-2) | Santa Cruz, sc-17829 | WB |
| β-Actin | Monoclonal Anti-β-Actin antibody (clone AC-15) | Sigma-Aldrich #A5441 | WB |
| GAPDH | GAPDH (D16H11) XP® Rabbit mAb | Cell Signaling Technology #5174 | WB |

**Supplementary Table 4.** siRNAs.

| **Gene name** | **siRNA** | **Duplex Sequence (5’-3’)** |
| --- | --- | --- |
| ***ATF4 (human)*** | *siATF4-1* | rGrGrUrCrArGrUrCrCrCrUrCrCrArArCrArArCrArGrCrAAG |
| rCrUrUrGrCrUrGrUrUrGrUrUrGrGrArGrGrGrArCrUrGrArCrCrArA |
| *siATF4-2* | rArUrArGrUrCrArGrGrArGrCrGrUrCrArArUrGrUrGrCrUTG |
| rCrArArGrCrArCrArUrUrGrArCrGrCrUrCrCrUrGrArCrUrArUrCrC |
| ***MTHFD2 (human)*** | *siMTHFD2-1* | rGrUrArUrUrCrCrArArArUrCrUrGrArUrCrArCrArGrCrAGA |
| rUrCrUrGrCrUrGrUrGrArUrCrArGrArUrUrUrGrGrArArUrArCrCrU |
| *siMTHFD2-2* | rGrCrUrUrGrGrGrUrArArGrUrArCrGrCrArArCrUrUrArCTT |
| rArArGrUrArArGrUrUrGrCrGrUrArCrUrUrArCrCrCrArArGrCrUrG |
| ***Negative control*** | *siCtrl* | N/A (Proprietary, AllStar Neg. Control siRNA, QIAGEN #1027281) |

**Supplementary Table 5.** RT-qPCR primers.

| **Gene name** | **Primer** | **Sequence (5’-3’)** |
| --- | --- | --- |
| ***MTHFD2*** | Fwd | AGGACGAATGTGTTTGGATCAG |
| Rev | GGAATGCCAGTTCGCTTGATTA |
| ***RPLP0*** | Fwd | TCCTCGTGGAAGTGACATCGT |
| Rev | CTGTCTTCCCTGGGCATCA |
| ***ACTB*** | Fwd | AGGCACCAGGGCGTGAT |
| Rev | GCCCACATAGGAATCCTTCTGAC |
